# Supplementary material
Source: publisher figshare collection journal article supplement (https://asha.figshare.com/articles/dataset/_/9807812)
Supplement: Supplementary file 2 [file 1]

**Supplemental Material S3.** Examples of compare–contrast summaries for included participants (mazes and abandoned/unanalyzed utterances removed).

**Pair 1:**

TD: So basically after years of having Lifeland be thriving and doing really well, more people have moved into Lifeland and the government has noticed that the population has grown in a very short time, therefore making food hard to buy. Homes are hard to be found. Jobs are being taken everyday and just life overall is harder for the Lifelands to live there because of the growing population. So with jobs being harder to find not many 18-year-olds or higher go to college. There are very few who go to college. And not very many go to high school after going to grade school. So overall, life in Lifeland has increased and it has been harder to get food, jobs, homes. Most of the homes that people find are very run-down. They don't have water. They don't have many luxuries. Very few people are allowed to own homes and they have to get permission to change homes like paining, bedrooms, things like that, and just life is not as luxury as it used to be.

TBI: Houses and apartments and buldings were built in Lifeland's city. No more than six apartments are allowed on a street. A household of four people will probably start starving and dying of thirst and start running out of room. It talked about how 35% of Americans have houses. How Lifeland's city doesn't like crowds because they might run out of water and food. And they're going to build factories and movie theatres.

**Pair 2:**

TD: So it covers four topics in the cities of Lifeland: housing, education, jobs, and growth. The housing, it's very hard to find a house. They're very small. And it's not very good living conditions. Education, it's very competitive. They all get into elementary school. But then moving onto high school and college, only selected students are able to do that. If you make it to college, you will be able to have a more variety of options for jobs. It's hard to get a job in the cities. Some people have to wait up to four years to find a job. And when they do, it's hard to get increase in pays. Then growth. They're growing at a 35% increase and they want to stop people from moving into the cities. They just want to grow from within. The 35% increase is making it very hard to live. So getting groceries, it's a much longer line. Everything just takes a lot longer to do because there are so many more people in the city.

TBI: There's too many people. So they might not have enough jobs. That's not good.

**Pair 3:**

TD: So that story was kind of discussing the quality of life in Lifeland, which is less than ideal. Mostly because the living situation is not great. They live in pretty crowded apartments and while education is good for lower levels, it's not as good for higher learning especially college. Very few Lifelands attend college because there just aren't enough spots, and as a result, a lot of Lifelands don't have great jobs. Also because they don't have good jobs, there's not a lot of home ownership or ownership of anything. The government owns most everything. There's also a lot of overcrowding happening. People are trying to more into the city making it more crowded and pollution is an issue. So I think just a concern for the quality of life in Lifeland.

TBI: The children want to quit a job or quit school because of all that's happening around the world now. And it's the police and teachers that are keeping the children in school. And some people keep the people in jobs to stay. So if they keep preaching this and telling everybody about this, a million of children will stay in school until they graduate. And that's the right thing to do because you don't want kids to fail school where they will never be able to get a job. So I'd tell them to stay in school because that's a smart thing to do.

**Pair 4:**

TD: So since their rise in their culture and having advancements in technology, after the world has caught up to where they are now, the Lifelands have decreased in their sanitation and just overpopulated cities. Not many people can get good jobs because only a select few can go to college. And even when they do, they become officers or higher ups. And it seems like they couldn't really help their families that are still down below. And the people who are already living in the cities don't want people moving in more, because it's causing even more overpopulation than there already is. They don't have a lot of water. And they don't have running water or electricity. That's on the downside of things. They can't even really have a pet other than a hamster. So it seems like they're going in a real downfall.

TBI: In Lifeland, there are too many people trying to move in because it's such a great country, and so they set laws to only have six apartments on each street. And about each month, you pay about 36% tax. And they think too many people want to move in. And they just keep doing stuff to help them make more money.

**Pair 5:**

TD: Reporters are talking about the living situation in Lifeland and it compares to the United States. The apartments have less taxes, but they are smaller. And so larger families have to live in an apartment and so it's really difficult. And they have to use a small amount of space for a lot. Very few families get actual homes, and if they do have a home, they have to follow very specific instructions of how to maintain it. And then it goes on to talk about education, and how they do have a very good education program, but it's not widely available to everyone. Everyone completes grade school, and then anyone who's musically talented then moves on to key school, but only them. And then very few from the key school move onto high school. And then same thing to college. And so very few people go to college. And those are the only ones that get high-ranking positions in the city. And then anyone who doesn't end up in a very official city position ends up just working in stores or something along those lines, or a factory. And once you have a job, you keep it. But it may take a few years to get a job, and you only get a raise every ten years. So it's not very beneficial to anyone. The living situation in general isn't very good because the population keeps growing because of people's interest in sports. And how it's starting to concern the government and they are thinking of new ways to reduce travel time. That way it's less chaotic. And they are worries about the future if too many people end up in the same city.

TBI: So, she was talking about this small city called Lifeland and how there's really not many people there. If more people move to Lifeland it will probably just get more crowded and less space. And it's just talking about how little that town is. And how many people is not even there. It talked about this one event.
