# Supplementary material
Source: publisher figshare collection journal article supplement (https://asha.figshare.com/articles/dataset/_/9807812)
Supplement: Supplementary file 3 [file 1]

**Supplemental Material S4.** Participant-level data for outcome variables (bolding indicates statistically significant differences between groups).

| Outcome Variable                  | Compare–Contrast |           | Cause–Effect |           | Narrative   |             |
|-----------------------------------|------------------|-----------|--------------|-----------|-------------|-------------|
|                                   | TBI              | TD        | TBI          | TD        | TBI         | TD          |
| <b>Total Number of C-Units</b>    |                  |           |              |           |             |             |
| P1                                | <b>5</b>         | <b>16</b> | <b>8</b>     | <b>19</b> | 13          | 10          |
| P2                                | <b>3</b>         | <b>18</b> | <b>1</b>     | <b>14</b> | 2           | 12          |
| P3                                | <b>6</b>         | <b>12</b> | <b>5</b>     | <b>12</b> | 9           | 7           |
| P4                                | <b>5</b>         | <b>11</b> | <b>8</b>     | <b>9</b>  | 7           | 10          |
| P5                                | <b>6</b>         | <b>28</b> | <b>3</b>     | <b>13</b> | 15          | 11          |
| <b>Number Different Word-Rate</b> |                  |           |              |           |             |             |
| P1                                | 9.2              | 5.5       | 5.6          | 6.4       | 6.3         | 9.0         |
| P2                                | 4.3              | 4.8       | 12.0         | 6.2       | 8.5         | 7.2         |
| P3                                | 9.5              | 6.7       | 6.8          | 5.6       | 5.7         | 7.0         |
| P4                                | 9.2              | 8.5       | 6.0          | 8.8       | 7.7         | 8.8         |
| P5                                | 6.0              | 4.5       | 8.0          | 7.5       | 4.7         | 7.3         |
| <b>Mean Length of C-unit</b>      |                  |           |              |           |             |             |
| P1                                | 12.6             | 11.1      | 10.9         | 16.1      | <b>9.6</b>  | <b>15.5</b> |
| P2                                | 9.8              | 9.8       | 11.0         | 12.6      | <b>8.5</b>  | <b>13.6</b> |
| P3                                | 11.0             | 11.0      | 12.2         | 10.5      | <b>12.7</b> | <b>12.7</b> |
| P4                                | 14.5             | 14.5      | 11.3         | 17.0      | <b>10.6</b> | <b>16.4</b> |
| P5                                | 10.2             | 10.2      | 7.0          | 15.1      | <b>8.3</b>  | <b>11.8</b> |
| <b>Subordination Unit</b>         |                  |           |              |           |             |             |
| P1                                | 1.2              | 1.3       | 1.6          | 1.9       | 1.5         | 2.3         |
| P2                                | 1.0              | 1.1       | 1.0          | 1.3       | 1.0         | 1.7         |
| P3                                | 2.2              | 1.3       | 1.4          | 1.4       | 1.4         | 1.3         |
| P4                                | 1.4              | 2.0       | 1.4          | 2.1       | 1.4         | 1.9         |
| P5                                | 1.2              | 1.2       | 1.0          | 1.9       | 1.1         | 1.7         |
| <b>Mazes per Utterance</b>        |                  |           |              |           |             |             |
| P1                                | 1.4              | 0.6       | 0.2          | 0.7       | 0.1         | 0.1         |
| P2                                | 0.0              | 0.6       | 0.8          | 1.1       | 0.0         | 0.0         |
| P3                                | 0.0              | 0.7       | 0.7          | 0.9       | 0.0         | 0.0         |
| P4                                | 0.2              | 1.5       | 1.2          | 1.3       | 0.3         | 0.3         |

|                                          |            |            |            |            |     |     |
|------------------------------------------|------------|------------|------------|------------|-----|-----|
| P5                                       | 0.7        | 0.2        | 0.5        | 0.6        | 1.1 | 1.1 |
| <b>Filled Pauses / Utterance</b>         |            |            |            |            |     |     |
| P1                                       | 1.2        | 0.4        | <b>0.0</b> | <b>0.6</b> | 0.0 | 0.1 |
| P2                                       | 0.0        | 0.4        | <b>0.0</b> | <b>0.8</b> | 0.0 | 0.5 |
| P3                                       | 0.0        | 0.4        | <b>0.0</b> | <b>0.8</b> | 0.0 | 0.6 |
| P4                                       | 0.2        | 1.0        | <b>0.6</b> | <b>1.0</b> | 0.1 | 0.7 |
| P5                                       | 0.5        | 0.2        | <b>0.3</b> | <b>0.5</b> | 0.5 | 0.2 |
| <b>Revisions / Utterance</b>             |            |            |            |            |     |     |
| P1                                       | 0.0        | 0.1        | 0.4        | 0.1        | 0.1 | 0.1 |
| P2                                       | 0.0        | 0.2        | 0.0        | 0.2        | 0.0 | 0.1 |
| P3                                       | 0.0        | 0.2        | 0.2        | 0.1        | 0.0 | 0.1 |
| P4                                       | 0.0        | 0.2        | 0.1        | 0.3        | 0.0 | 0.3 |
| P5                                       | 0.2        | 0.0        | 1.0        | 0.1        | 0.3 | 0.2 |
| <b>Repetitions / Utterance</b>           |            |            |            |            |     |     |
| P1                                       | 0.2        | 0.0        | 0.0        | 0.1        | 0.0 | 0.0 |
| P2                                       | 0.0        | 0.0        | 0.0        | 0.1        | 0.0 | 0.2 |
| P3                                       | 0.0        | 0.1        | 0.0        | 0.0        | 0.0 | 0.0 |
| P4                                       | 0.0        | 0.3        | 0.0        | 0.0        | 0.1 | 0.2 |
| P5                                       | 0.0        | 0.0        | 0.0        | 0.0        | 0.3 | 0.1 |
| <b>Pauses / Utterance</b>                |            |            |            |            |     |     |
| P1                                       | <b>4.0</b> | <b>2.1</b> | 2.1        | 2.6        | 2.4 | 2.9 |
| P2                                       | <b>4.0</b> | <b>2.6</b> | 7.0        | 3.1        | 5.5 | 2.7 |
| P3                                       | <b>3.3</b> | <b>1.7</b> | 3.6        | 1.7        | 2.9 | 2.9 |
| P4                                       | <b>3.6</b> | <b>2.5</b> | 3.4        | 3.2        | 2.6 | 3.3 |
| P5                                       | <b>2.0</b> | <b>0.9</b> | 2.0        | 0.8        | 1.5 | 1.0 |
| <b>Between-Clause Pauses / Utterance</b> |            |            |            |            |     |     |
| P1                                       | 0.2        | 0.0        | 0.4        | 0.2        | 0.4 | 0.6 |
| P2                                       | 0.0        | 0.1        | 0.0        | 0.1        | 0.0 | 0.3 |
| P3                                       | 0.3        | 0.3        | 0.4        | 0.2        | 0.1 | 0.1 |
| P4                                       | 0.2        | 0.1        | 0.0        | 0.4        | 0.4 | 0.2 |
| P5                                       | 0.0        | 0.0        | 0.0        | 0.2        | 0.0 | 0.2 |
| <b>Within-Clause Pauses / Utterance</b>  |            |            |            |            |     |     |
| P1                                       | <b>2.4</b> | <b>1.1</b> | 0.9        | 1.3        | 1.0 | 1.1 |

|                                       |            |            |     |     |     |     |
|---------------------------------------|------------|------------|-----|-----|-----|-----|
| P2                                    | <b>3.0</b> | <b>1.3</b> | 6.0 | 1.9 | 5.5 | 1.6 |
| P3                                    | <b>1.8</b> | <b>0.6</b> | 2.4 | 0.6 | 1.9 | 1.7 |
| P4                                    | <b>1.8</b> | <b>1.2</b> | 2.0 | 1.8 | 0.6 | 2.3 |
| P5                                    | <b>1.0</b> | <b>0.3</b> | 1.3 | 0.2 | 0.9 | 0.5 |
| <b>Average pause length (seconds)</b> |            |            |     |     |     |     |
| P1                                    | 1.9        | 0.5        | 2.1 | 0.7 | 1.4 | 0.7 |
| P2                                    | 1.7        | 0.5        | 2.8 | 0.8 | 0.6 | 0.6 |
| P3                                    | 0.4        | 0.6        | 0.7 | 0.5 | 0.6 | 0.7 |
| P4                                    | 1.1        | 0.6        | 1.0 | 0.5 | 1.0 | 0.5 |
| P5                                    | 0.8        | 0.5        | 0.7 | 0.4 | 0.7 | 0.4 |

---
