# Supplementary material
Source: publisher figshare collection journal article supplement (https://asha.figshare.com/articles/dataset/_/9807812)
Supplement: Supplementary file 4 [file 1]

**Supplemental Material S1.** Summary and description of lecture stimuli.

| Discourse Variable    | Expository                                                                                                                 |                                                                                                                                           | Narrative                                                                                                                       |
|-----------------------|----------------------------------------------------------------------------------------------------------------------------|-------------------------------------------------------------------------------------------------------------------------------------------|---------------------------------------------------------------------------------------------------------------------------------|
|                       | Compare–Contrast                                                                                                           | Cause–Effect                                                                                                                              |                                                                                                                                 |
| Number of Words       | 743                                                                                                                        | 731                                                                                                                                       | 935                                                                                                                             |
| Number of Sentences   | 51                                                                                                                         | 50                                                                                                                                        | 57                                                                                                                              |
| Words per Sentence    | 14.5                                                                                                                       | 14.6                                                                                                                                      | 16.4                                                                                                                            |
| Paragraphs            | 8                                                                                                                          | 8                                                                                                                                         | 8                                                                                                                               |
| Flesch Reading Ease   | 61.7                                                                                                                       | 66                                                                                                                                        | 66.4                                                                                                                            |
| Description/Main Idea | Living in Lifeland has advantages and disadvantages in the areas of housing, education, employment, and population growth. | Early Lifeland inventions affected the development of other nations' early inventions, shipbuilding, written languages, and architecture. | The good of humankind was observed in the "man in the water," who died after saving people following a plane crash in Lifeland. |
